# Supplementary material for: Clinical Performance of Two SARS-CoV-2 Serologic Assays
Source: Oxford University Press journal article supplement (doi:10.1093/clinchem/hvaa120), 2020-05-12
Supplement: hvaa120_supplementary_data.pdf [file hvaa120_supplementary_data.pdf]

**Supplemental Table 1** Sensitivity of EUROIMMUN SARS-CoV-2

| <b>EUROIMMUN Borderline as (-)</b> |                           |                            |                             |                             |
|------------------------------------|---------------------------|----------------------------|-----------------------------|-----------------------------|
|                                    | <b>&lt;3</b>              | <b>3 to 7</b>              | <b>8 to 13</b>              | <b>&gt;14</b>               |
| Positive                           | 0                         | 2                          | 12                          | 41                          |
| Negative                           | 12                        | 18                         | 11                          | 7                           |
| <b>Sensitivity (95% CI)</b>        | <b>0.00% (0.00-26.47)</b> | <b>10.00% (1.24-31.70)</b> | <b>52.17% (30.59-73.18)</b> | <b>85.42% (72.24-93.93)</b> |

**Supplemental Table 2** Imprecision of Abbott and EUROIMMUN SARS-CoV-2 Assays

|           |              | <u>Repeatability</u> |      |       |       | <u>Total Imprecision</u> |       |        |       |
|-----------|--------------|----------------------|------|-------|-------|--------------------------|-------|--------|-------|
|           |              | Mean <sup>a</sup>    | SD   | %CV   | # Pos | Mean <sup>a</sup>        | SD    | %CV    | # Pos |
| Abbott    | Negative QC  | 0.55                 | 0.01 | 9.30% | 0/20  | 0.54                     | 0.005 | 9.10%  | 0/20  |
|           | Positive QC  | 3.21                 | 0.05 | 1.40% | 20/20 | 3.2                      | 0.05  | 1.40%  | 20/20 |
|           | Patient Pool | 1.66                 | 0.03 | 1.90% | 20/20 | 1.7                      | 0.03  | 1.90%  | 20/20 |
| EUROIMMUN | Negative QC  | 0.16                 | 0.01 | 7.34% | 0/10  | 0.16                     | 0.01  | 7.60%  | 0/9   |
|           | Positive QC  | 2.42                 | 0.1  | 3.73% | 0/10  | 2.44                     | 0.1   | 4.16%  | 9/9   |
|           | Patient Pool | 1.92                 | 0.18 | 9.61% | 0/10  | 1.7                      | 0.21  | 12.25% | 9/9   |

<sup>a</sup> The units are a ratio of the specimen relative to an assay specific calibrator

**Supplemental Table 3** Impact of Hemolysis, icterus, and lipemia on SARS-CoV-2 serologic assays

|                                     | Abbott                     |                      | EUROIMMUN                  |                      |
|-------------------------------------|----------------------------|----------------------|----------------------------|----------------------|
|                                     | <u>Result</u> <sup>a</sup> | <u>% of Original</u> | <u>Result</u> <sup>a</sup> | <u>% of Original</u> |
| <b>Hemolysis Index</b> <sup>b</sup> |                            |                      |                            |                      |
| 7                                   | 1.69                       | 100.0%               | 1.90                       | 100.0%               |
| 47                                  | 1.70                       | 100.6%               | 1.83                       | 96.3%                |
| 81                                  | 1.70                       | 100.9%               | 1.87                       | 98.4%                |
| 150                                 | 1.69                       | 100.3%               | 1.63                       | 85.8%                |
| 284                                 | 1.70                       | 100.6%               | 1.87                       | 98.4%                |
| 563                                 | 1.68                       | 99.4%                | 1.68                       | 88.4%                |
| 1089                                | 1.70                       | 100.6%               | 1.72                       | 90.5%                |
| <b>Lipemic Index</b> <sup>b</sup>   |                            |                      |                            |                      |
| 20                                  | 1.71                       | 100.0%               | 1.69                       | 100.0%               |
| 51                                  | 1.67                       | 97.7%                | 1.69                       | 100.0%               |
| 76                                  | 1.70                       | 99.1%                | 1.64                       | 97.0%                |
| 132                                 | 1.71                       | 99.7%                | 1.75                       | 103.6%               |
| 241                                 | 1.68                       | 98.2%                | 1.74                       | 103.0%               |
| 568                                 | 1.68                       | 98.2%                | 1.85                       | 109.5%               |
| 1015                                | 1.66                       | 96.8%                | 1.85                       | 109.5%               |
| <b>Icteric Index</b> <sup>b</sup>   |                            |                      |                            |                      |
| 1                                   | 1.86                       | 100.0%               | 1.60                       | 100.0%               |
| 3                                   | 1.83                       | 98.4%                | 2.02                       | 126.3%               |
| 5                                   | 1.80                       | 97.0%                | 1.95                       | 121.9%               |
| 9                                   | 1.81                       | 97.3%                | 1.73                       | 108.1%               |
| 17                                  | 1.79                       | 96.5%                | 1.10                       | 68.8%                |
| 41                                  | 1.83                       | 98.4%                | 1.87                       | 116.9%               |
| 66                                  | 1.86                       | 100.3%               | 1.89                       | 118.1%               |

<sup>a</sup> The units are a ratio of the specimen relative to an assay specific calibrator

<sup>b</sup> Hemolysis, icteric, and lipemic indices are all reported in arbitrary units

**Supplemental Table 4** Carryover on Abbott Architect

| <b>Sample</b>        | <b>Result</b> | <b>Low-Low Result</b> | <b>High-Low Result</b> |
|----------------------|---------------|-----------------------|------------------------|
| Negative 1           | 0.02          |                       |                        |
| Negative 2           | 0.02          | 0.02                  |                        |
| Negative 3           | 0.02          | 0.02                  |                        |
| High 1               | 6.83          |                       |                        |
| High 2               | 6.84          |                       |                        |
| Negative 4           | 0.02          |                       | 0.02                   |
| High 3               | 6.8           |                       |                        |
| High 4               | 6.81          |                       |                        |
| Negative 5           | 0.02          |                       | 0.02                   |
| Negative 6           | 0.02          | 0.02                  |                        |
| Negative 7           | 0.02          | 0.02                  |                        |
| Negative 8           | 0.02          | 0.02                  |                        |
| High 5               | 6.72          |                       |                        |
| High 6               | 6.72          |                       |                        |
| Negative 9           | 0.02          |                       | 0.02                   |
| High 7               | 6.91          |                       |                        |
| High 8               | 6.93          |                       |                        |
| Negative 10          | 0.02          |                       | 0.02                   |
| High 9               | 6.84          |                       |                        |
| High 10              | 6.8           |                       |                        |
| Negative 11          | 0.02          |                       | 0.02                   |
| <b>Mean Negative</b> | <b>0.02</b>   | 0.02                  | 0.02                   |

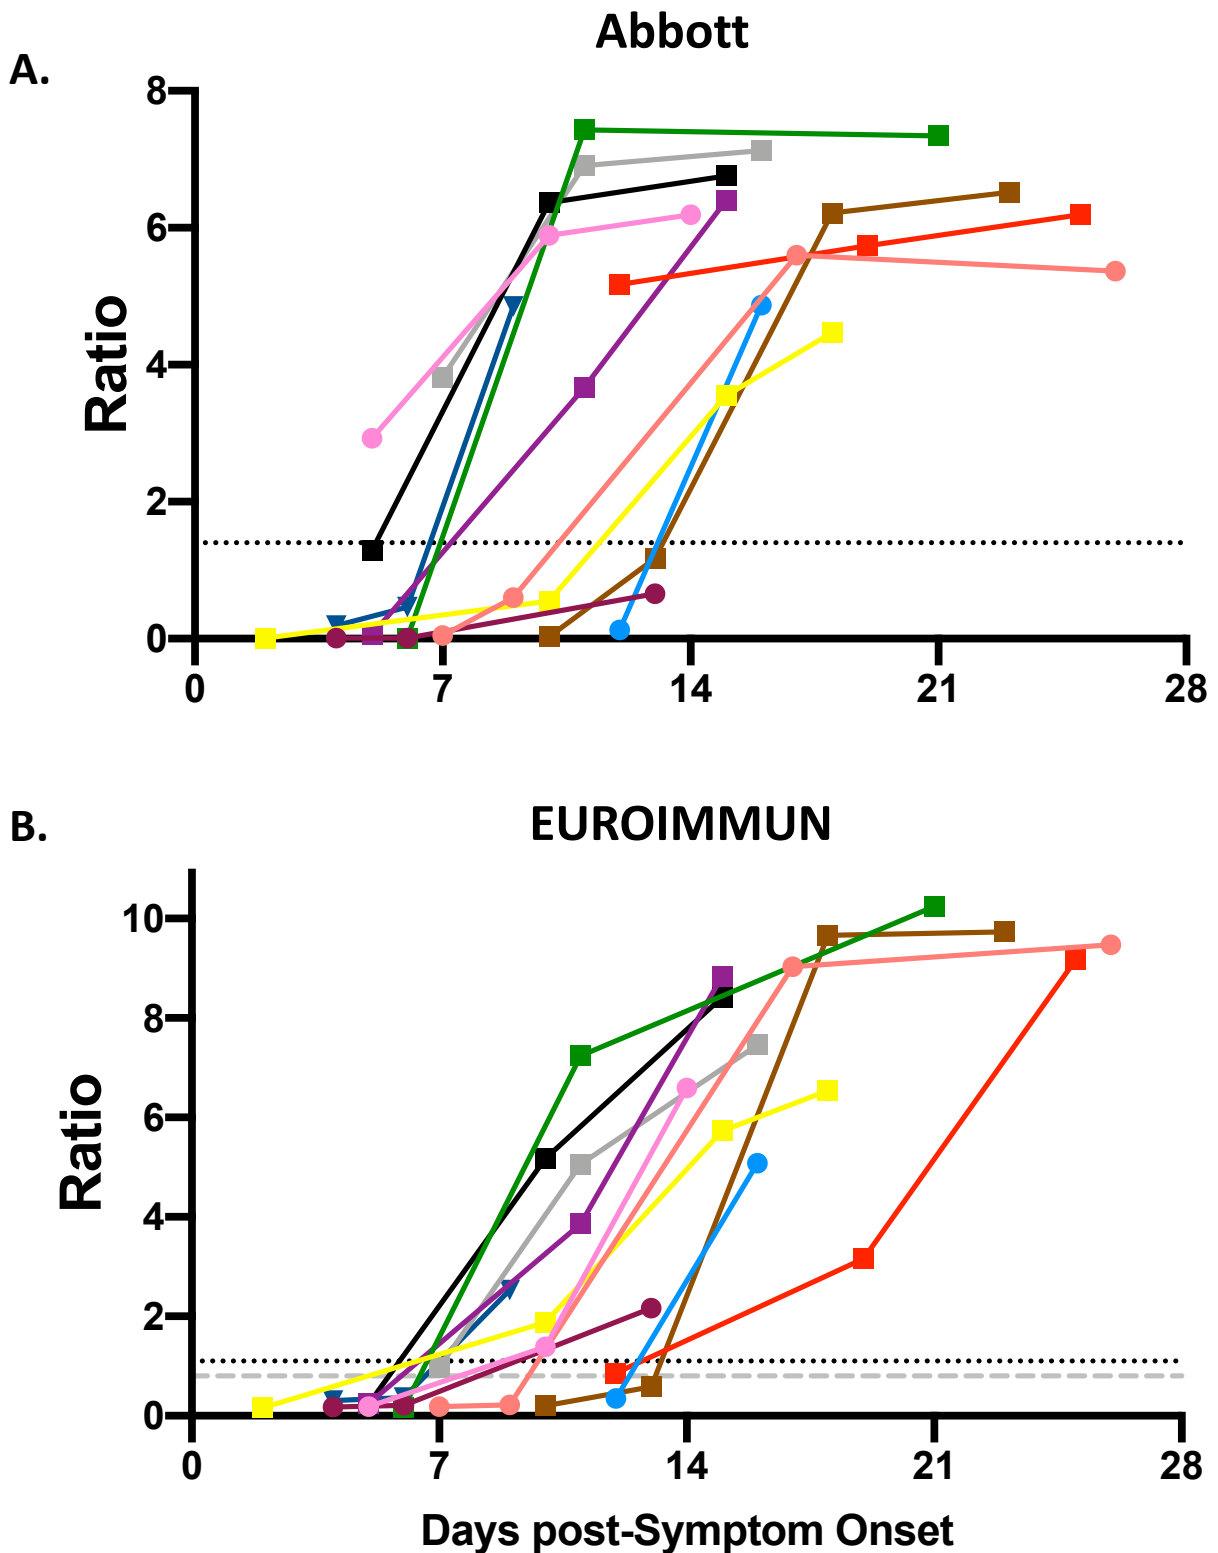

**Supplemental Fig. 1.** Seroconversion in 12 patients with serial samples. (A) Abbott SARS-CoV-2 IgG Immunoassay. Dotted line represents the cutoff off for positivity (Ratio  $\geq 1.4$ ). (B) EUROIMMUN Anti-SARS-CoV-2 IgG ELISA. Dotted line represents the cutoff off for positivity (Ratio  $\geq 1.1$ ). Dashed gray line represents cutoff for negativity (Ratio  $< 0.8$ ). The color and shape of each point corresponds to a single patient measured serially with both assays.

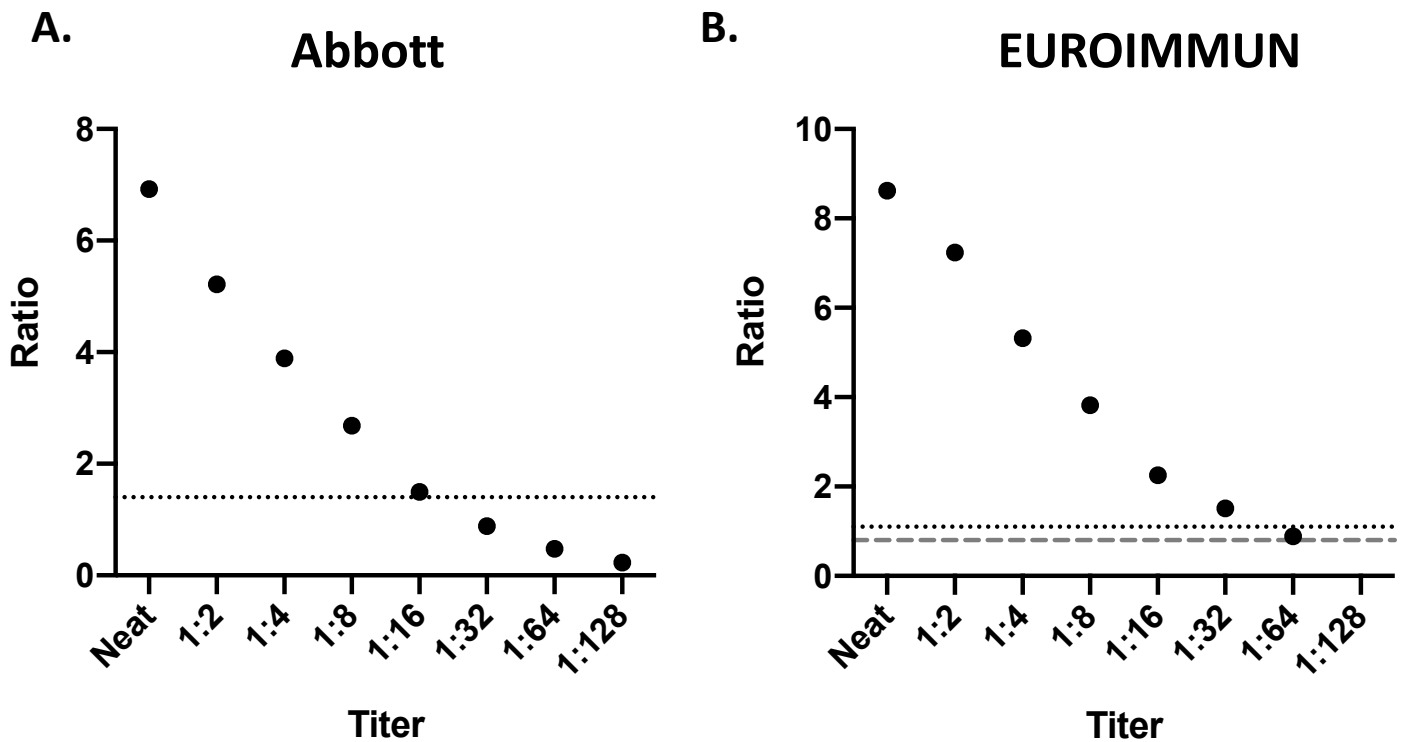

**Supplemental Fig. 2.** Serial dilution curves for a single SARS-CoV-2 IgG positive patient. (A) Abbott SARS-CoV-2 IgG Immunoassay. Dotted line represents the cutoff off for positivity (Ratio  $\geq 1.4$ ). (B) EUROIMMUN Anti-SARS-CoV-2 IgG ELISA. Dotted line represents the cutoff off for positivity (Ratio  $\geq 1.1$ ). Dashed gray line represents cutoff for negativity (Ratio  $< 0.8$ ). Due to limited reagent availability, the 1:128 dilution was not performed on the EUROIMMUN.
